# Supplementary material for: Utilizing the Drake Passage Time-series to understand variability and change in subpolar Southern Ocean pCO 2
Source: Copernicus journal article supplement (doi:10.5194/bg-2017-489), 2017-12-01

### Supplementary Figure 1

Map of Polar-front Antarctic Zone (PAZ) which is defined at  $1^\circ \times 1^\circ$  resolution as the region between the subantarctic front and the northern extent of sea ice [Williams et al. 2017]. The red line represents the boundaries of the location of the Subpolar seasonally stratified (SPSS) biome [Fay & McKinley, 2014]. The black box represents the Drake Passage region considered in the supplementary figures that follow.

### Supplementary Figure 2

Mean surface ocean  $p\text{CO}_2$  seasonal cycle estimate for years 2002-2015, for the PAZ region from each dataset, shown on an 18-month cycle, calculated from a time-series with the atmospheric trend removed ( $1.95 \mu\text{atm yr}^{-1}$ ). Shading represents 1 standard error for biome-scale monthly means. Bar plot indicates the number of years containing observations in a given month (maximum of 14 years) for the SOCAT-DP, SOCAT-noDP, and SOCAT-all datasets.

### Supplementary Figure 3

Surface ocean  $p\text{CO}_2$  trends in the PAZ region for years 2002-2015 ( $\mu\text{atm yr}^{-1}$ ): SOCATv4 data within the Drake Passage box (gray); SOCATv4 data excluding data from the Drake Passage box (green); SOCATv4 (blue); SOM-FFN product (magenta); SOM-FFN  $p\text{CO}_2$  product sampled as SOCATv4 data in the Drake Passage box (light pink). Figure includes annual trends (left), summer trends (center) and winter trends (right). SOCAT-noDP winter trend omitted because it did not contain a JJA value for every year of the time-series. For reference, the atmospheric  $p\text{CO}_2$  trend during the 2002-2015 period ( $1.95 \mu\text{atm yr}^{-1}$ ) is shown as a horizontal black line.

Supplementary Figure 1

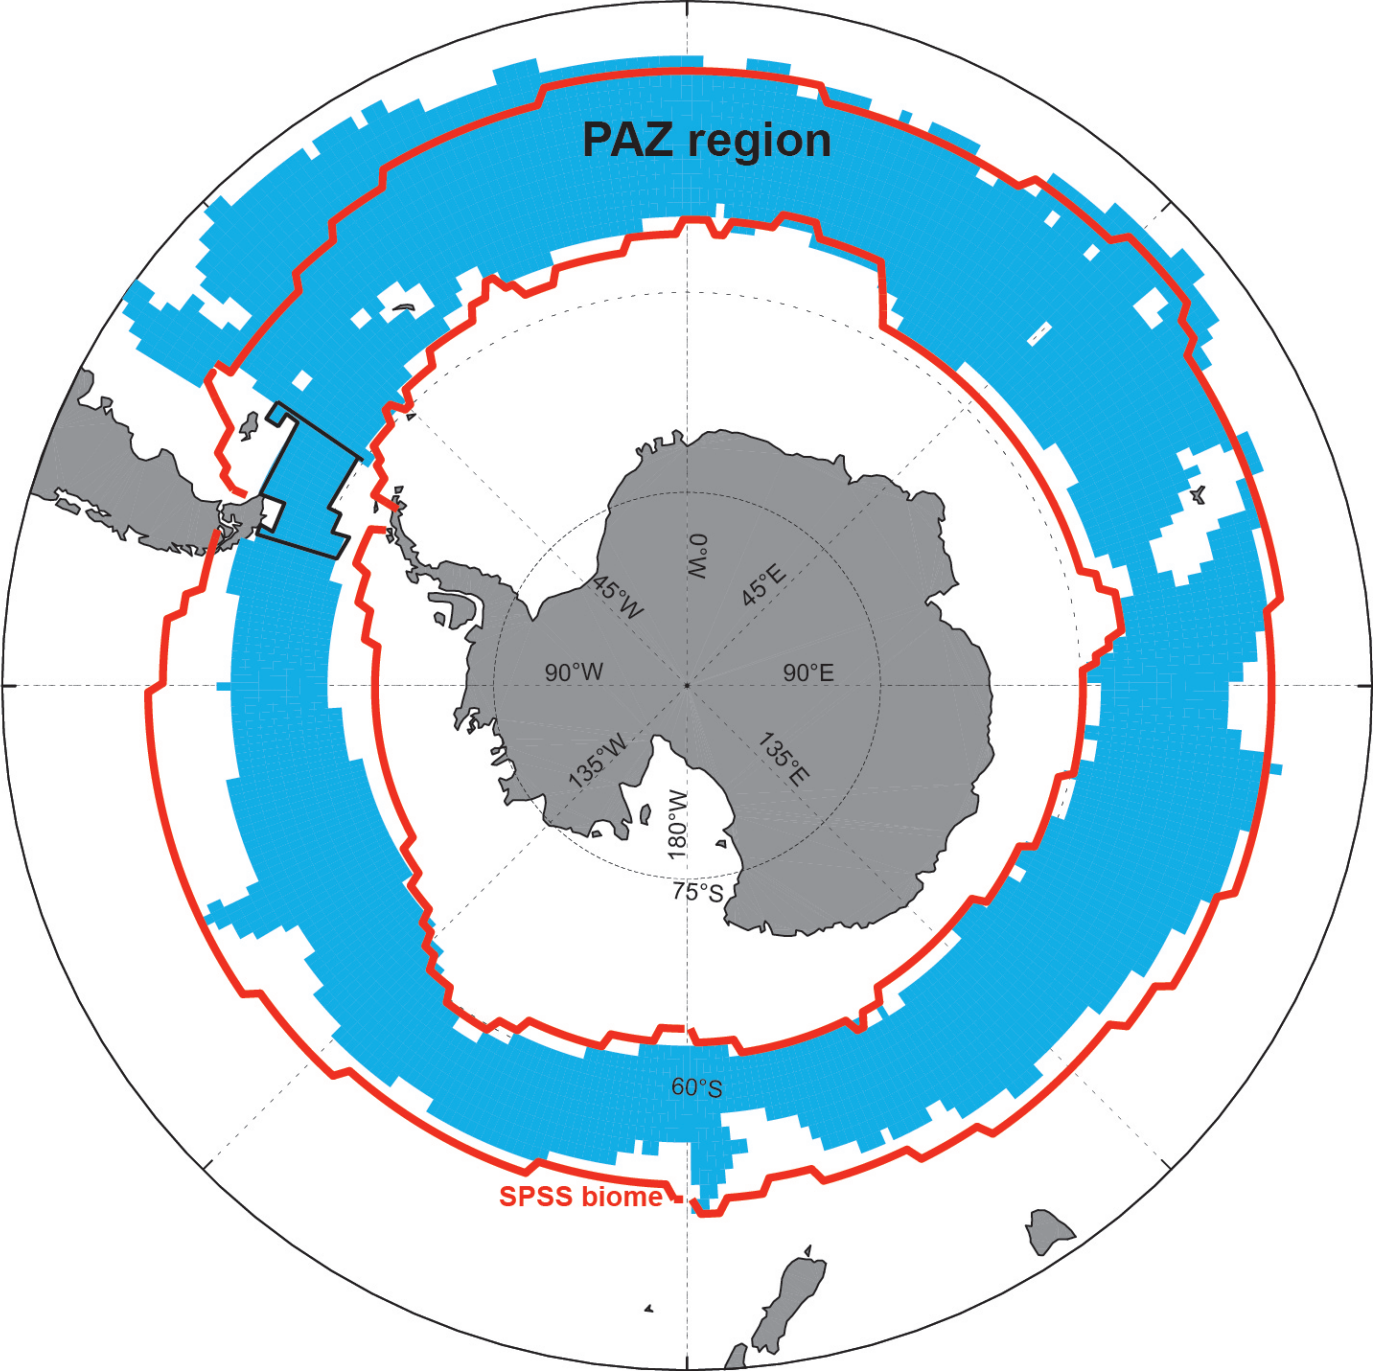

# Supplementary Figure 2

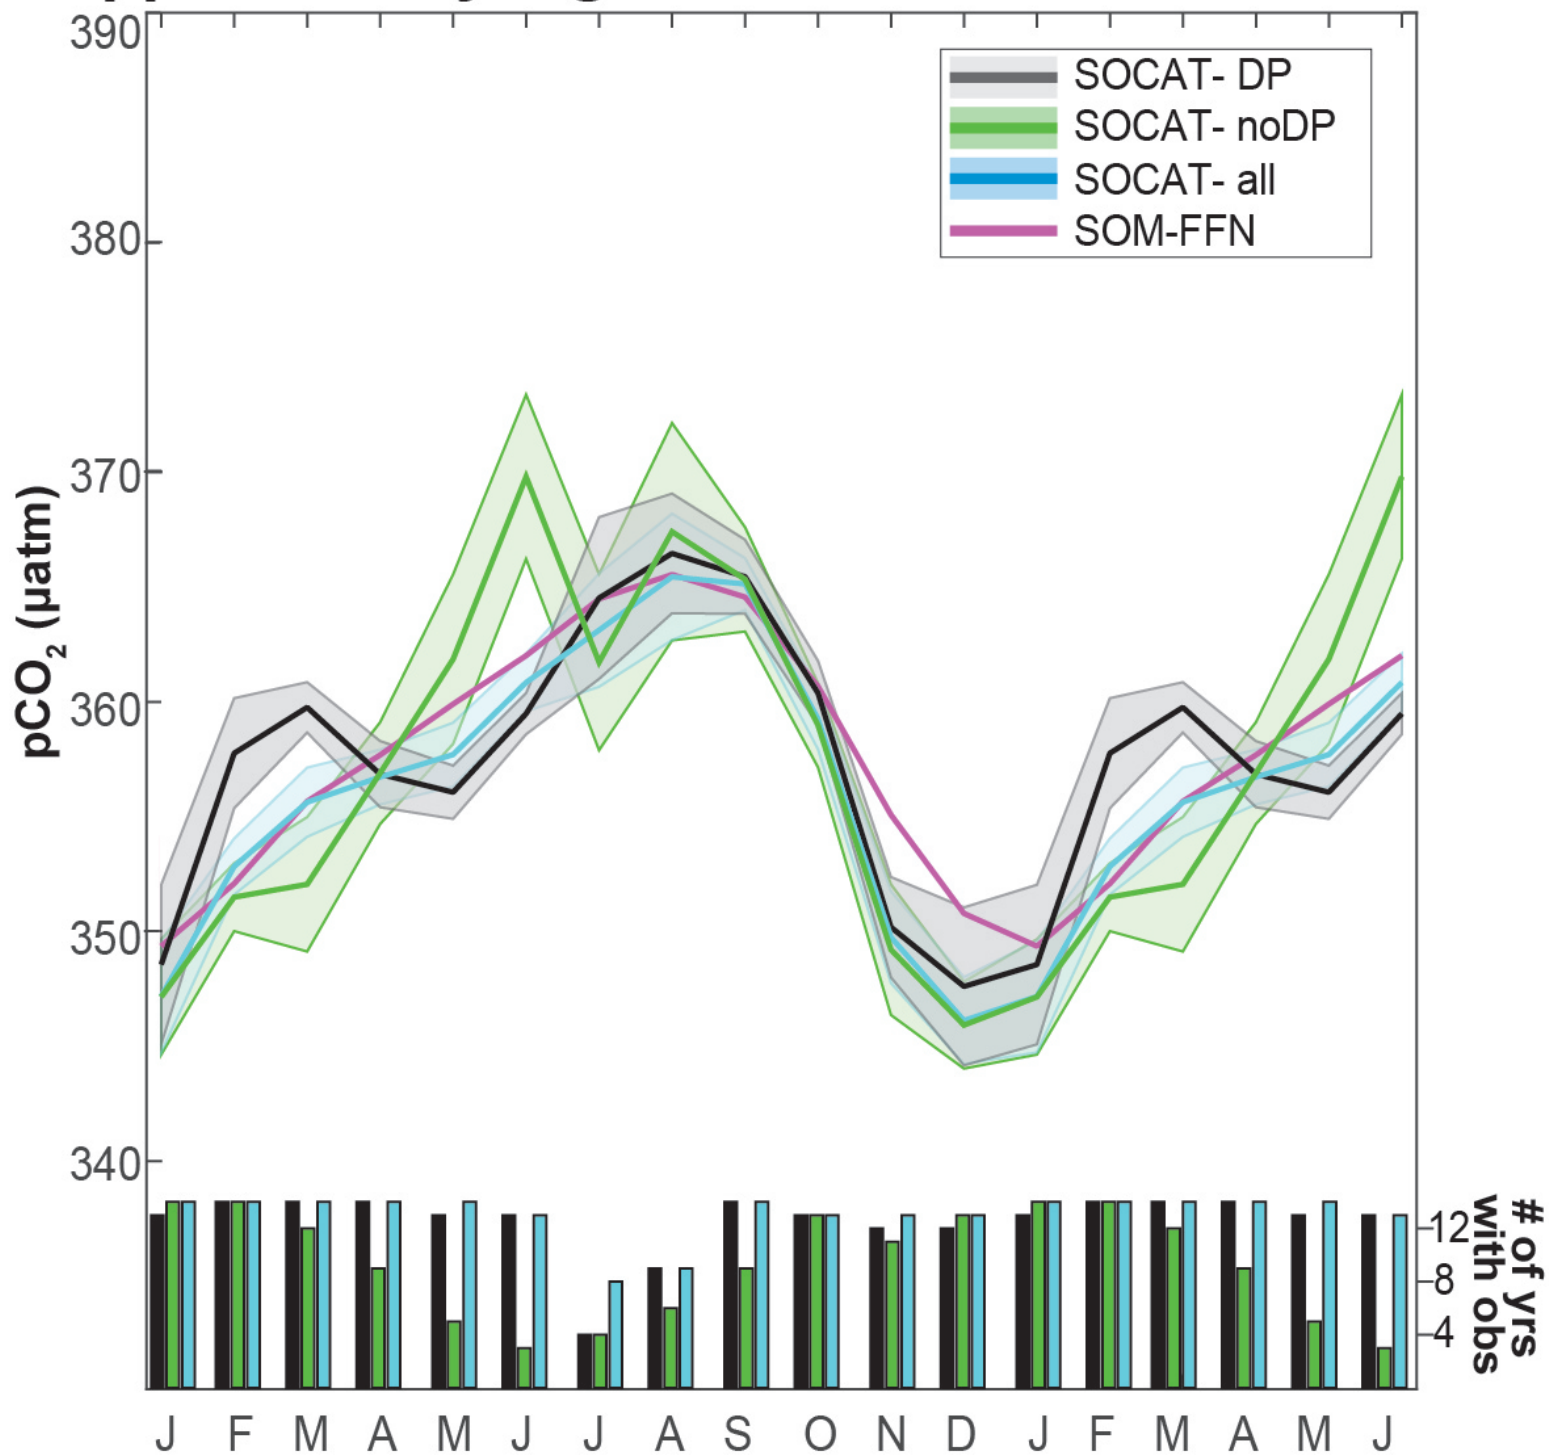

### Supplementary Figure 3

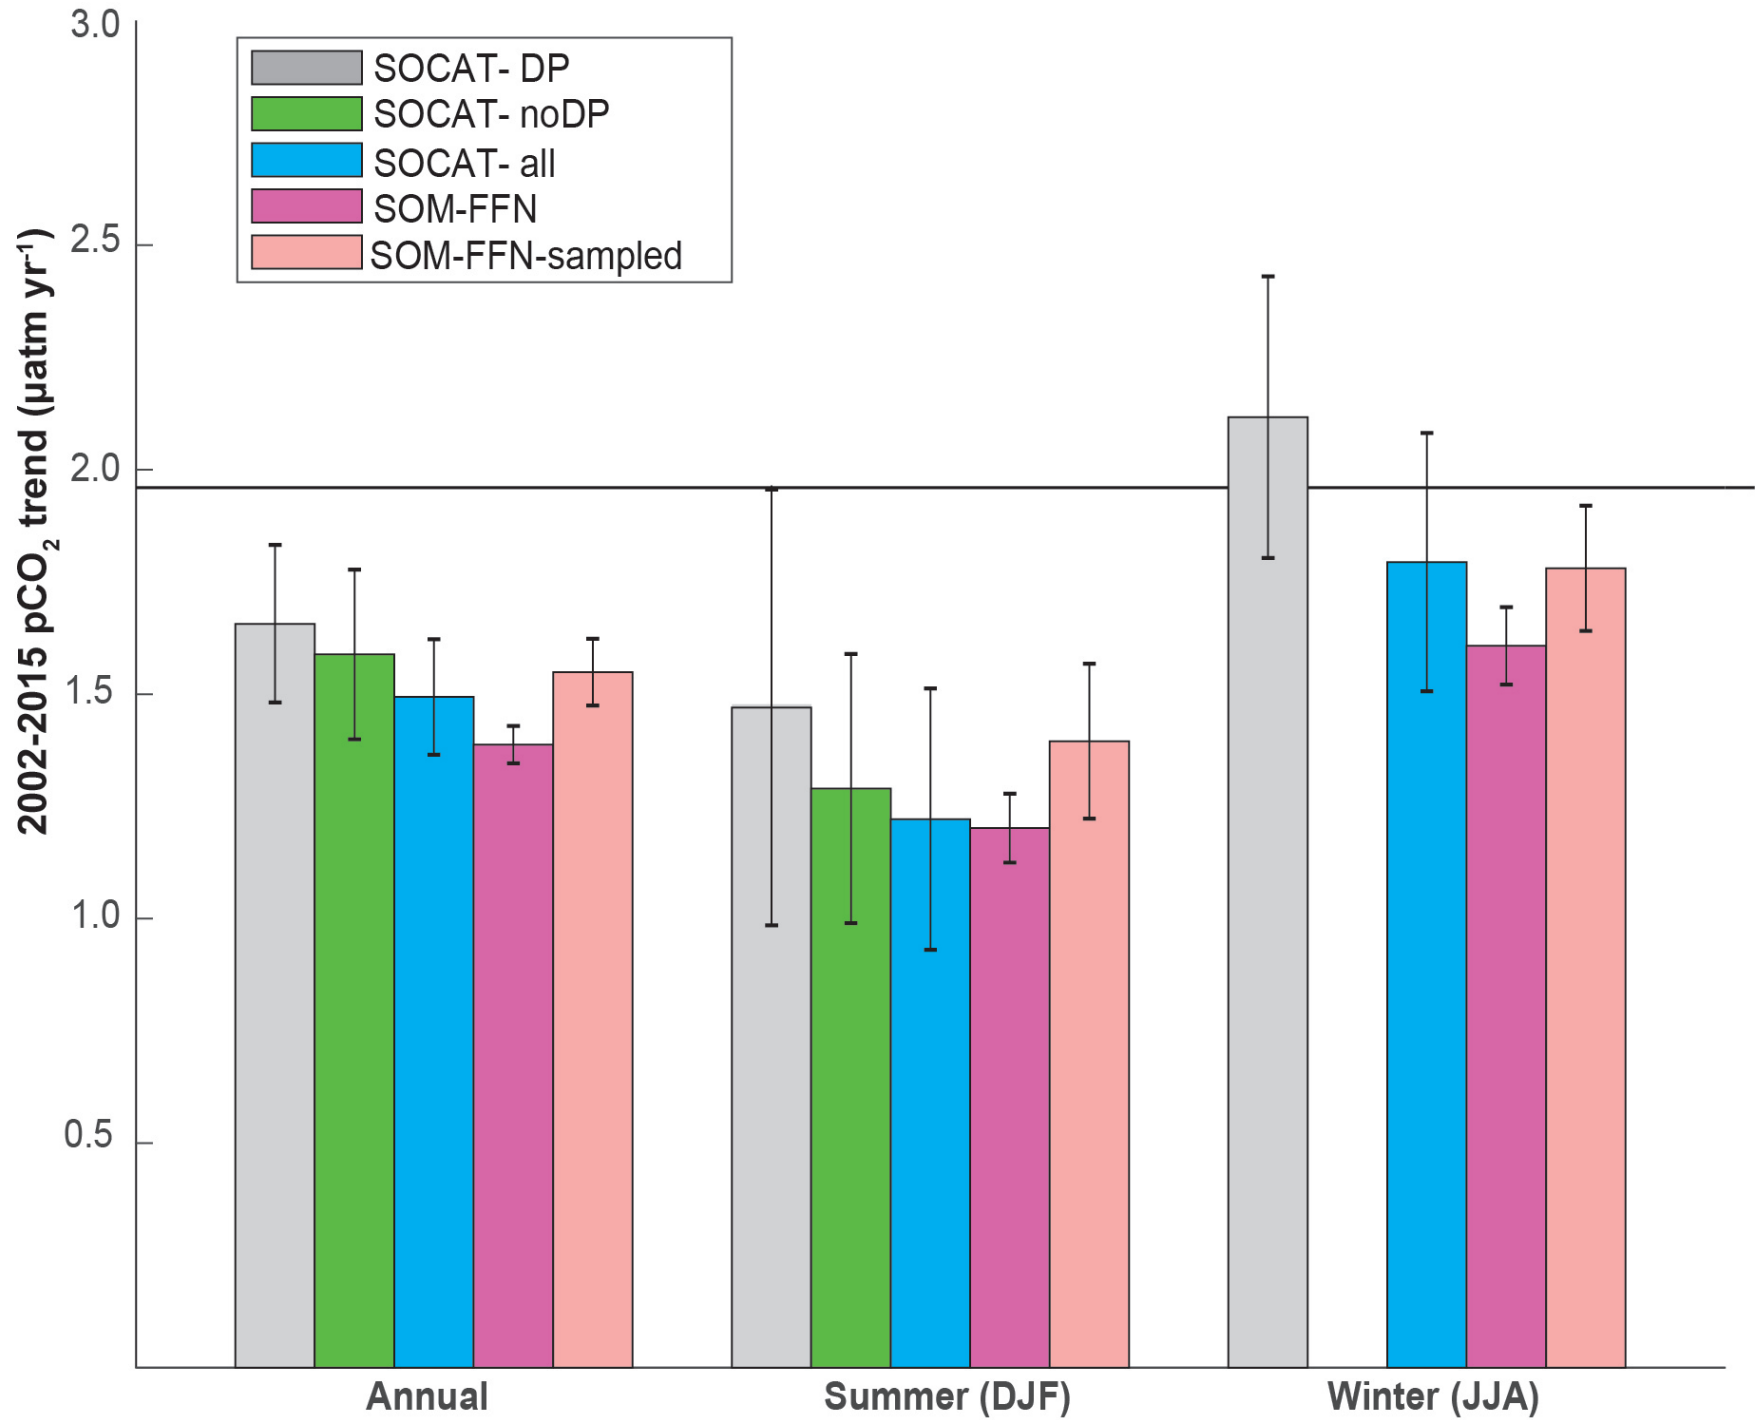

Supplement: Supplementary file 1 [file bg-2017-489-supplement.pdf]
